# Supplementary material
Source: Springer Nature journal article supplement (https://www.springermedizin.de/resource/supplementary/12914_2012_232_MOESM3_ESM.pdf/9537080)
Supplement: MOESM3 [file 9537080]

### **Health system barriers**

- lack of trained health care providers/female doctors
- High staff turnover
- Lack of standard protocols
- Lack of consumables and equipment
- Cost of health services and treatment
- Lack of or poor referral systems, feedback mechanisms and follow-up systems
- Distance to health facility

### **Societal/cultural barriers**

- Perceptions of female body size and weight gain/loss in relation to pregnancy
- Practices related to pregnant women's food
- Societal negligence of women's health
- Lack of decision-making power among women regarding their own health
- Stigmatisation
- Role of women in society and expectations that the pregnant woman move to her maternal home for delivery

### **Individual barriers**

- Not covered in this study

### **GDM detection and treatment**

### **Health outcomes**

#### **Short term**

Adverse pregnancy outcomes

#### **Long term**

Type 2 diabetes
